# Supplementary material for: The efficiency of cytosolic drug delivery using pH-responsive endosomolytic polymers does not correlate with activation of the NLRP3 inflammasome
Source: Royal Society of Chemistry journal article supplement (doi:10.1039/c8bm01643g), 2019-01-01
Supplement: c8bm01643g1.pdf [file c8bm01643g1.pdf]

## **SUPPLEMENTARY INFORMATION**

*for*

### **The efficiency of cytosolic drug delivery using pH-responsive endosomolytic polymers does not correlate with activation of the NLRP3 inflammasome**

Jessalyn J. Baljon, Aamina Dandy, Lihong Wang-Bishop, Mohamed Wehbe, Max E. Jacobson and John T. Wilson

**Supporting Data:**

**Table S1**

**Molecular weight and composition of polymer library**

| <b>Polymer</b> | <b>PEG (Da)</b> | <b>DMAEMA-co-BMA (Da) by GPC</b> | <b>DMAEMA-co-BMA (Da) by <sup>1</sup>H NMR</b> | <b>% BMA</b> | <b>% DMAEMA</b> | <b>PDI</b> |
|----------------|-----------------|----------------------------------|------------------------------------------------|--------------|-----------------|------------|
| 0B             | 10,000          | 25,844                           | 19,299                                         | 0.0%         | 100.0%          | 1.09       |
| 30B            | 10,000          | 23,500                           | 22,383                                         | 29.6%        | 70.4%           | 1.073      |
| 40B            | 10,000          | 28,300                           | 24,203                                         | 40.2%        | 59.8%           | 1.252      |
| 50B            | 10,000          | 27,050                           | 25,643                                         | 50.2%        | 49.8%           | 1.188      |
| 60B            | 10,000          | 23,480                           | 24,856                                         | 58.1%        | 41.9%           | 1.203      |
| 100B           | 10,000          | 13,200                           | 20,235                                         | 100.0%       | 0.0%            | 1.035      |
